# Supplementary material for: Supramolecular block copolymers: graphene oxide composites for memory device applications
Source: Royal Society of Chemistry journal article supplement (doi:10.1039/c1cc15945c), 2011-11-14
Supplement: c1cc15945c.pdf [file c1cc15945c.pdf]

## Electronic Supplementary Information

### Supromolecular block copolymers:graphene oxide composites for memory device applications

An-Dih Yu,<sup>a</sup> Cheng-Liang Liu\*<sup>b</sup> and Wen-Chang Chen\*<sup>a</sup>

<sup>a</sup> Department of Chemical Engineering, National Taiwan University, Taipei 10617, Taiwan.  
*Fax:* +886-2-2362-3040; *Tel:* +886-2-2362-8398; *E-mail:* chenwc@ntu.edu.tw

<sup>b</sup> Department of Organic Device Engineering and Research Center for Organic Electronics,  
Yamagata University, Yonezawa, Yamagata 992-8510, Japan. *Fax:* +81-238-26-3309; *Tel:*  
+81-238-26-3309; *E-mail:* clliu@yz.yamagata-u.ac.jp

### TEM characterization of polymer composites

Transmission electron microscopy (TEM) images were obtained with a JEOL JEM-1230 TEM instrument operating at a voltage of 50 kV with a Gatam dual vision CCD camera. The samples for TEM measurement were prepared by spin-coated on NaCl substrate, and then put into deionized water. The composite films were floated on the water surface and subsequently placed onto 200-mesh copper grids.

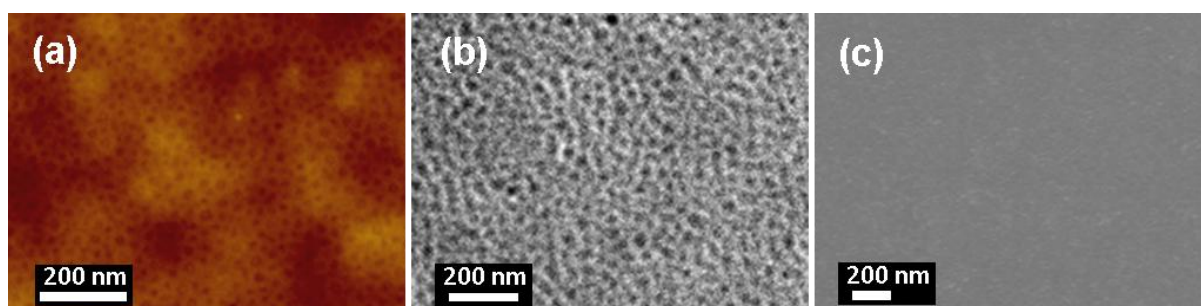

**Fig. S1** AFM, TEM and SEM image of PS-*b*-P4VP BCP.
